# Supplementary material for: Expression of Streptococcus pneumoniae Bacteriocins Is Induced by Antibiotics via Regulatory Interplay with the Competence System
Source: PLoS Pathog. 2016 Feb 3;12(2):e1005422. doi: 10.1371/journal.ppat.1005422 (PMC4739728; doi:10.1371/journal.ppat.1005422)
Supplement: S2 Table — (DOCX) [file ppat.1005422.s010.docx]

**S2 Table**. Strains and plasmids used in this study.

|  | Characteristics* | References |
| --- | --- | --- |
| *S. pneumoniae* strains |  |  |
| D39 | Serotype 2 strain | [1] |
| DLA3 | D39, *ΔbgaA*::(P*ssbB-luc*, *tet*R) | [2] |
| D-PEP23 | D39, *Δcep::(P3-luc, spcR*) | [3] |
| FB121 | D39, *ΔbgaA::tet*R, *Δcep::*(*PblpA-LGZ, spcR*) | This study |
| FB123 | D39, *ΔbgaA::tet*R, *Δcep::*(*PblpU-LGZ, spcR*) | This study |
| FB125 | D39, *ΔbgaA::tet*R, *Δcep::*(*PblpT-LGZ, spcR*) | This study |
| FB127 | D39, *ΔbgaA::tet*R, *Δcep::*(*PblpS-LGZ, spcR*) | This study |
| FB129 | D39, *ΔbgaA::tet*R, *Δcep::*(*PblpV1-LGZ, spcR*) | This study |
| FB131 | D39, *ΔbgaA::tet*R, *Δcep::*(*PblpA-LGZ, spcR*), *ΔblpSRHC::eryR* | This study |
| FB133 | D39, *ΔbgaA::tet*R, *Δcep::*(*PblpU-LGZ, spcR*), *ΔblpSRHC::eryR* | This study |
| FB135 | D39, *ΔbgaA::tet*R, *Δcep::*(*PblpT-LGZ, spcR*), *ΔblpSRHC::eryR* | This study |
| FB137 | D39, *ΔbgaA::tet*R, *Δcep::*(*PblpS-LGZ, spcR*), *ΔblpSRHC::eryR* | This study |
| FB139 | D39, *ΔbgaA::tet*R, *Δcep::*(*PblpV1-LGZ, spcR*), *ΔblpSRHC::eryR* | This study |
| FB141 | D39, *Δcep::*(*PblpT-LGZ, spcR*), *ΔblpSRHC::eryR* | This study |
| FB151 | D39, *ΔbgaA::tet*R, *Δcep::*(*PblpT-LGZ, spcR*), *ΔcomCDE::camR* | This study |
| FB153 | D39, *ΔbgaA::tet*R, *Δcep::*(*PblpT-LGZ, spcR*), *ΔcomA::eryR* | This study |
| FB155 | D39, *Δcep::*(*PblpT-LGZ, spcR*), *ΔblpSRHC::eryR*, *ΔbgaA*::(P*blpS*-*blpSRH, tetR)* | This study |
| FB194 | D39, *Δcep::*(*PblpT-LGZ, spcR*), *ΔblpSRHC::eryR*, *ΔcomCDE::camR* | This study |
| FB197 | D39, *ΔbgaA::tet*R, *Δcep::*(*PblpT-LGZ, spcR*), *ΔcomB::eryR* | This study |
| FB200 | D39, *ΔbgaA::tet*R, *Δcep::*(*PblpT-LGZ, spcR*), *ΔcomAB::eryR* | This study |
| FB204 | D39, *Δcep::*(*PblpT-LGZ, spcR*), *ΔbgaA*::(PZn-*comA, tetR)* | This study |
| FB207 | D39, *Δcep::*(*PblpT-LGZ, spcR*), *ΔbgaA*::(PZn-*comB, tetR)* | This study |
| FB210 | D39, *Δcep::*(*PblpT-LGZ, spcR*), *ΔbgaA*::(PZn-*comAB, tetR)* | This study |
| FB213 | D39, *Δcep::*(*PblpT-LGZ, spcR*), *ΔbgaA*::(PZn-*comAB, tetR), ΔcomAB::eryR* | This study |
| FB216 | D39, *Δcep::*(*PblpT-LGZ, spcR*), *ΔbgaA*::(PZn-*comAB, tetR), ΔcomCDE::camR* | This study |
| FB219 | D39, *Δcep::*(*PblpT-LGZ, spcR*) | This study |
| FB231 | D39, *Δcep::*(*PblpT-LGZ, spcR*), *ΔbgaA*::(P*ssbB-rfp, tetR*) | This study |
| MK110 | D39, *comCDE*, *ery*R | [2] |
| MK303 | D39, *ΔbgaA::tetR* | This study |
| MK304 | D39, *ΔbgaA::tet*R, *ΔblpSRHC::eryR* | This study |
| MK436 | D39, *ΔbgaA::tet*R, *Δcep::*(*PblpK-LGZ, spcR*), *ΔblpA’B’*::*ery* | This study |
| MK437 | D39, *ΔbgaA::tet*R, *Δcep::*(*PblpT-LGZ, spcR*), *ΔblpA’B’*::*ery* | This study |
| MK438 | D39, *ΔbgaA::tet*R, *Δcep::*(*PblpS-LGZ, spcR*), *ΔblpA’B’*::*ery* | This study |
| MK439 | D39, *ΔbgaA::tet*R, *Δcep::*(*PpncW-LGZ, spcR*), *ΔblpA’B’*::*ery* | This study |
| MK440 | D39, *ΔbgaA::*(PZn-*comAB*, tetR), *Δcep::*(*PblpT-LGZ, spcR*), *ΔblpA’B’*::*ery* | This study |
| MK441 | D39, *ΔbgaA::tet*R, *Δcep::*(*PblpA-LGZ, spcR*), *ΔblpA’B’*::*ery* | This study |
|  |  |  |
| Plasmids |  |  |
| pJWV25 | *ampR, bgaA’, tetR, PZn-gfp, ’bgaA* | [4] |
| pJWV100 | *ampR, bgaA’, tetR,* (no promoter) *gfp, ’bgaA* | [5] |
| pPEP1 | *camR*, *cep’*, *spcR*-MCS,*‘cep* | [3] |
| pPEP1-LGZ | *camR*, *cep’*, *spcR*, (no promoter)-*luc*-*gfp*-*lacZ*,*‘cep* | This study |
| pPEP1-P*blpT*-LGZ | *camR*, *cep’*, *spcR*-P*blpT*-*luc*-*gfp*-*lacZ*,*‘cep* | This study |
| pPEP1-P*blpU*-LGZ | *camR*, *cep’*, *spcR*-P*blpU*-*luc*-*gfp*-*lacZ*,*‘cep* | This study |
| pPEP1-P*blpS*-LGZ | *camR*, *cep’*, *spcR*-P*blpS*-*luc*-*gfp*-*lacZ*,*‘cep* | This study |
| pPEP1-P*blpA*-LGZ | *camR*, *cep’*, *spcR*-P*blpA*-*luc*-*gfp*-*lacZ*,*‘cep* | This study |
| pPEP1-P*blpV1*-LGZ | *camR*, *cep’*, *spcR*-P*blpV1*-*luc*-*gfp*-*lacZ*,*‘cep* | This study |
| pMK11 | *ampR*, *bgaA’*, *tetR*, PZn, *’bgaA* | This study |
| pMK11-P*Zn*-*comA* | *ampR*, *bgaA’*, *tetR*, PZn-*comA*, *’bgaA* | This study |
| pMK11-P*Zn*-*comB* | *ampR*, *bgaA’*, *tetR*, PZn-*comB*, *’bgaA* | This study |
| pMK11-P*Zn*-*comAB* | *ampR*, *bgaA’*, *tetR*, PZn-*comAB*, *’bgaA* | This study |
| pLA21 | *ampR*, *bgaA’*, *tetR*, P*ssbB*-rfp, *’bgaA* | [6] |

* In the constructs description, “LGZ” is short for the tripartite reporter cassette containing firefly luciferase, *luc* (L), *gfp* (G) and β-galactosidase , *lacZ* (Z).

**References**

1. Avery OT, Macleod CM, McCarty M. Studies on the chemical nature of the substance inducing transformation of pneumococcal types: induction of transformation by a deoxyribonucleic acid fraction isolated from pneumococcus type III. J Exp Med. 1944;79: 137–158.

2. Slager J, Kjos M, Attaiech L, Veening J-W. Antibiotic-induced replication stress triggers bacterial competence by increasing gene dosage near the origin. Cell. 2014;157: 395–406. doi:10.1016/j.cell.2014.01.068

3. Sorg RA, Kuipers OP, Veening J-W. Gene expression platform for synthetic biology in the human pathogen *Streptococcus pneumoniae*. ACS Synth Biol. 2014;4: 228–239. doi:10.1021/sb500229s

4. Eberhardt A, Wu LJ, Errington J, Vollmer W, Veening J-W. Cellular localization of choline-utilization proteins in *Streptococcus pneumoniae* using novel fluorescent reporter systems. Mol Microbiol. 2009;74: 395–408. doi:10.1111/j.1365-2958.2009.06872.x

5. Overkamp W, Beilharz K, Detert Oude Weme R, Solopova A, Karsens H, Kovács ÁT, et al. Benchmarking various green fluorescent protein variants in *Bacillus subtilis*, *Streptococcus pneumoniae*, and *Lactococcus lactis* for live cell imaging. Appl Environ Microbiol. 2013;79: 6481–6490. doi:10.1128/AEM.02033-13

6. Attaiech L, Minnen A, Kjos M, Gruber S, Veening J-W. The ParB-*parS* chromosome segregation system modulates competence development in *Streptococcus pneumoniae*. MBio. 2015;6: e00662–15. doi:10.1128/mBio.00662-15.
